# Supplementary figures and images for: NKTR-214 immunotherapy synergizes with radiotherapy to stimulate systemic CD8+ T cell responses capable of curing multi-focal cancer
Source: PubMed Central journal article supplement — J Immunother Cancer. 2020 May 25;8(1):e000464. doi: 10.1136/jitc-2019-000464 (PMC7252958; doi:10.1136/jitc-2019-000464), 2020-05-25

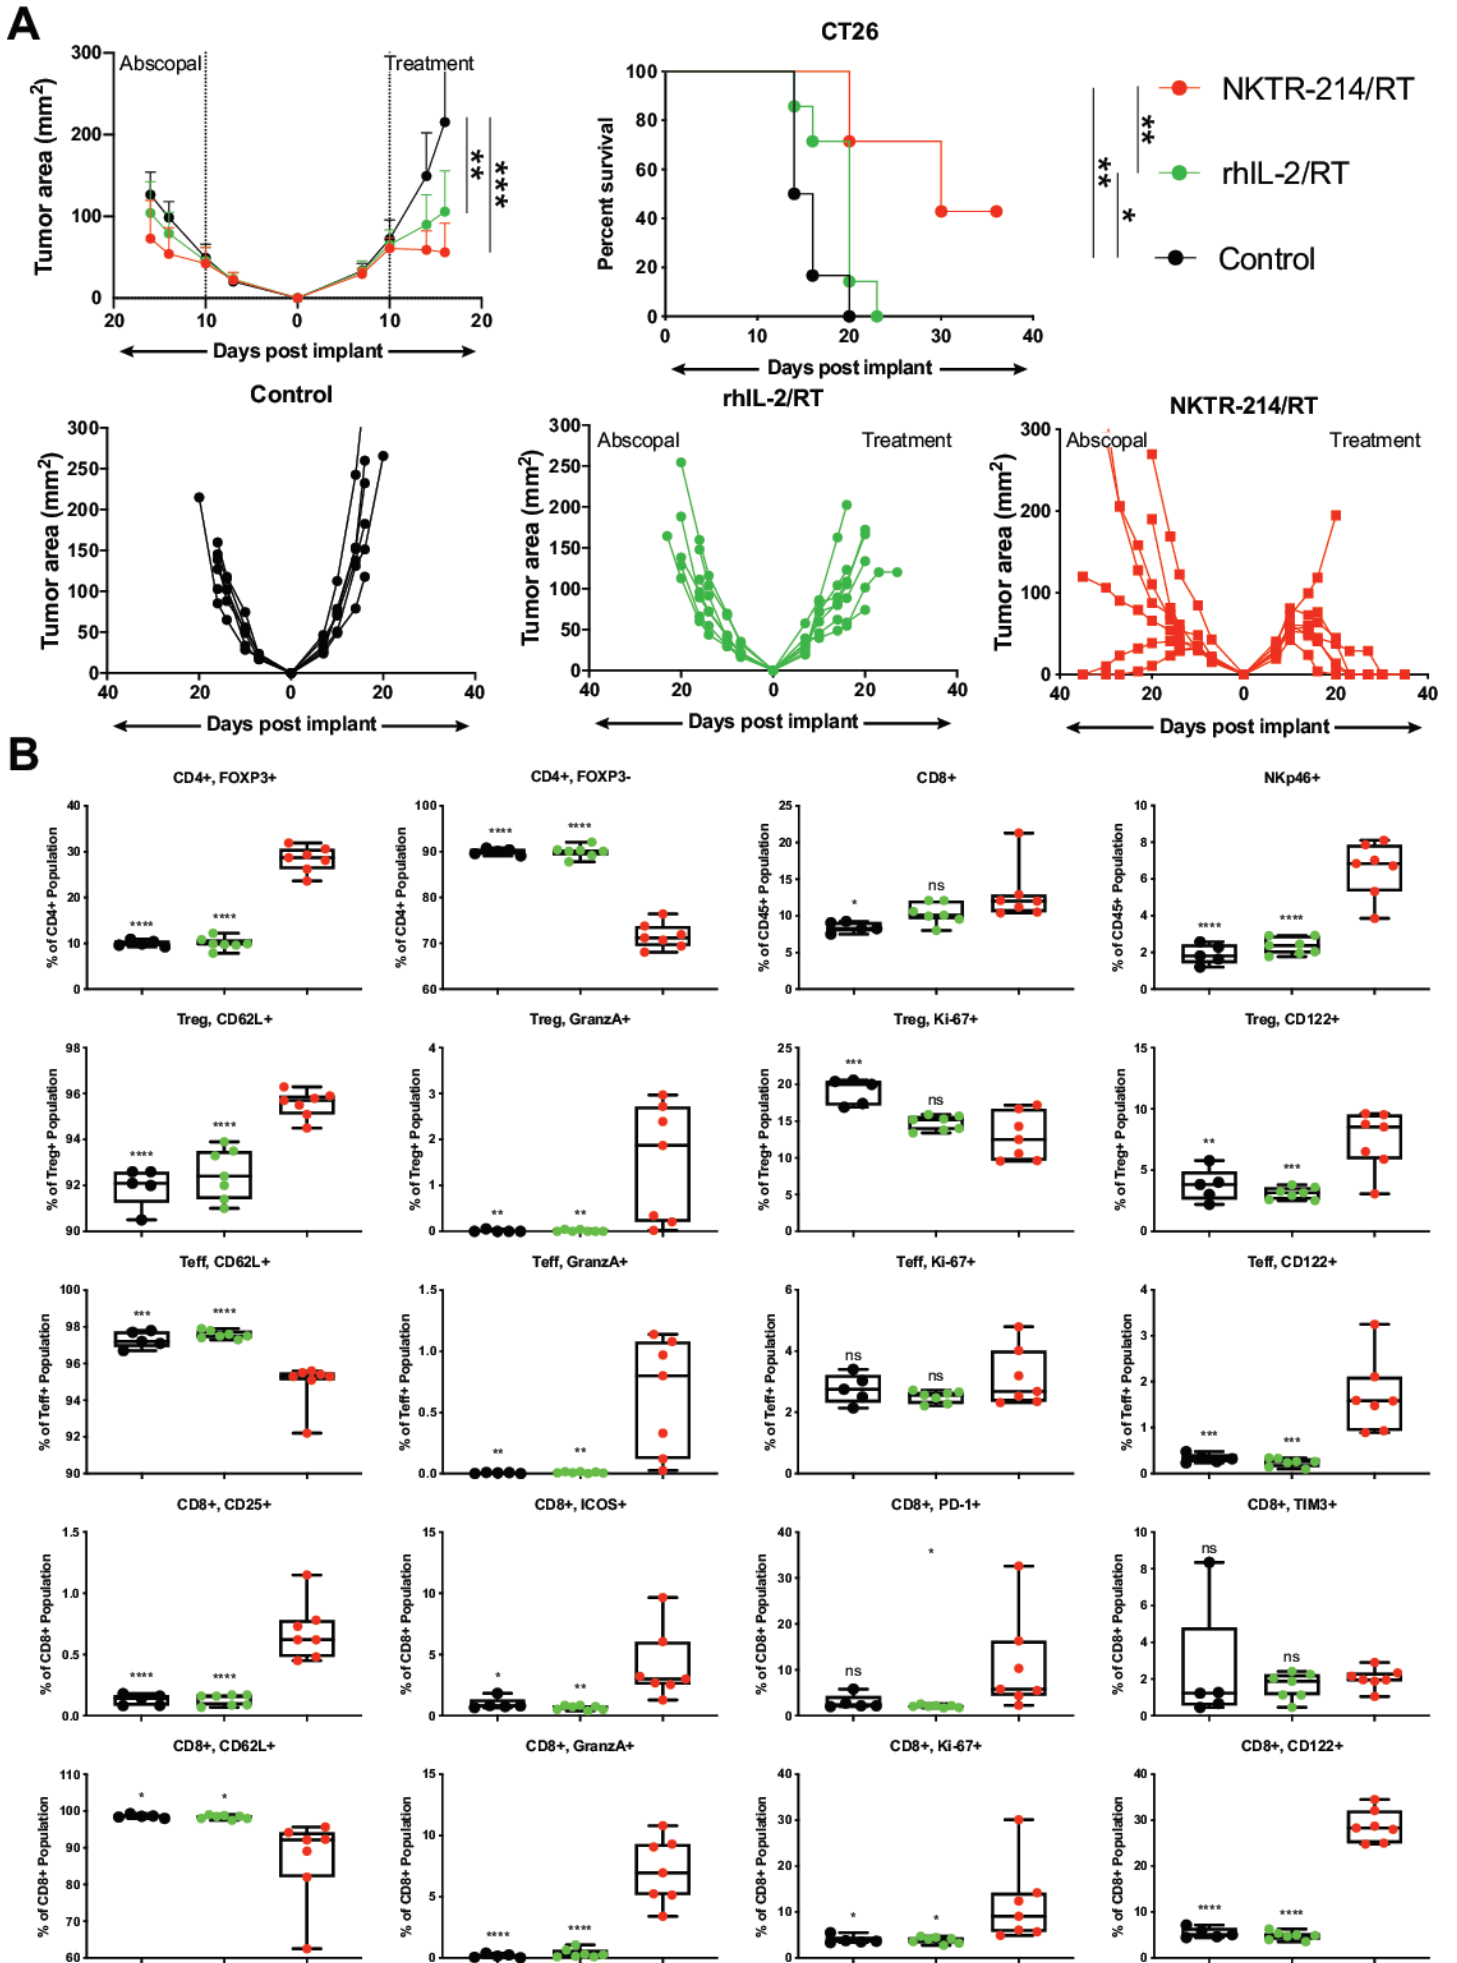

Supplement: jitc-2019-000464supp001.pdf [file jitc-2019-000464supp001.pdf]

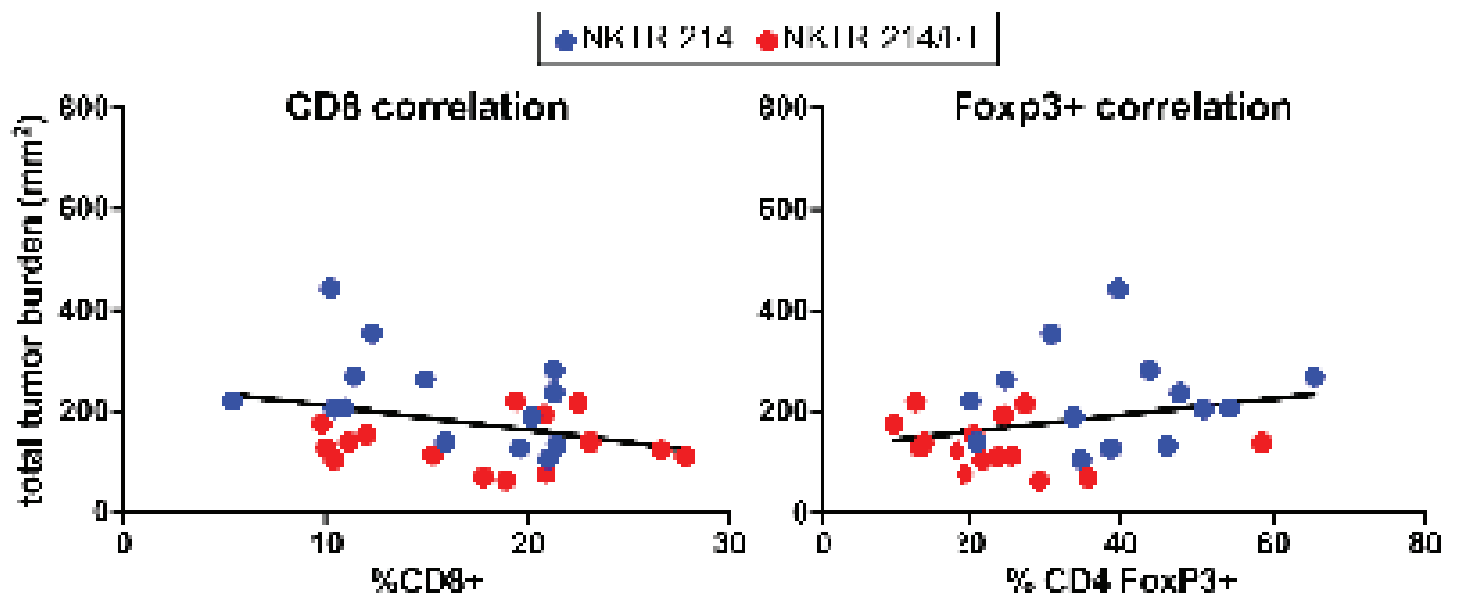

Supplement: jitc-2019-000464supp003.pdf [file jitc-2019-000464supp003.pdf]

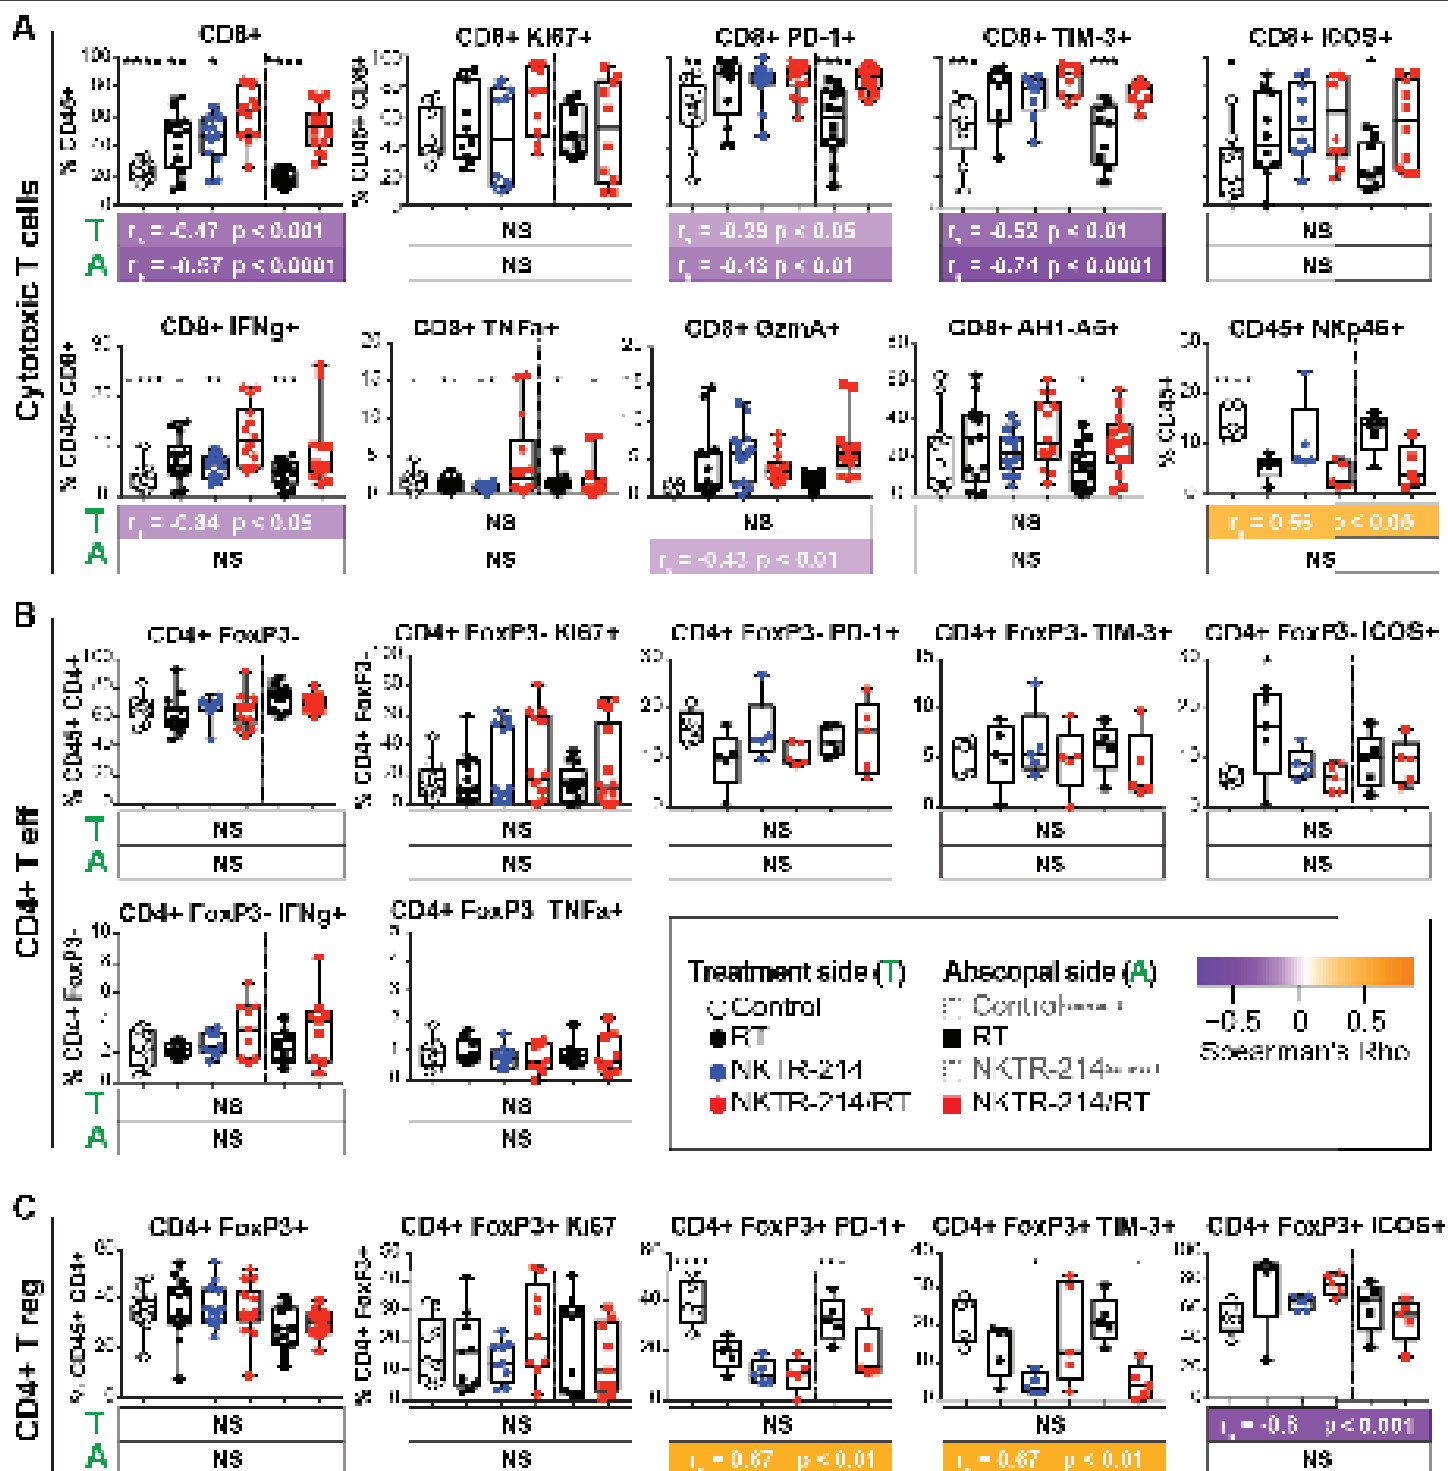

Supplement: jitc-2019-000464supp004.pdf [file jitc-2019-000464supp004.pdf]

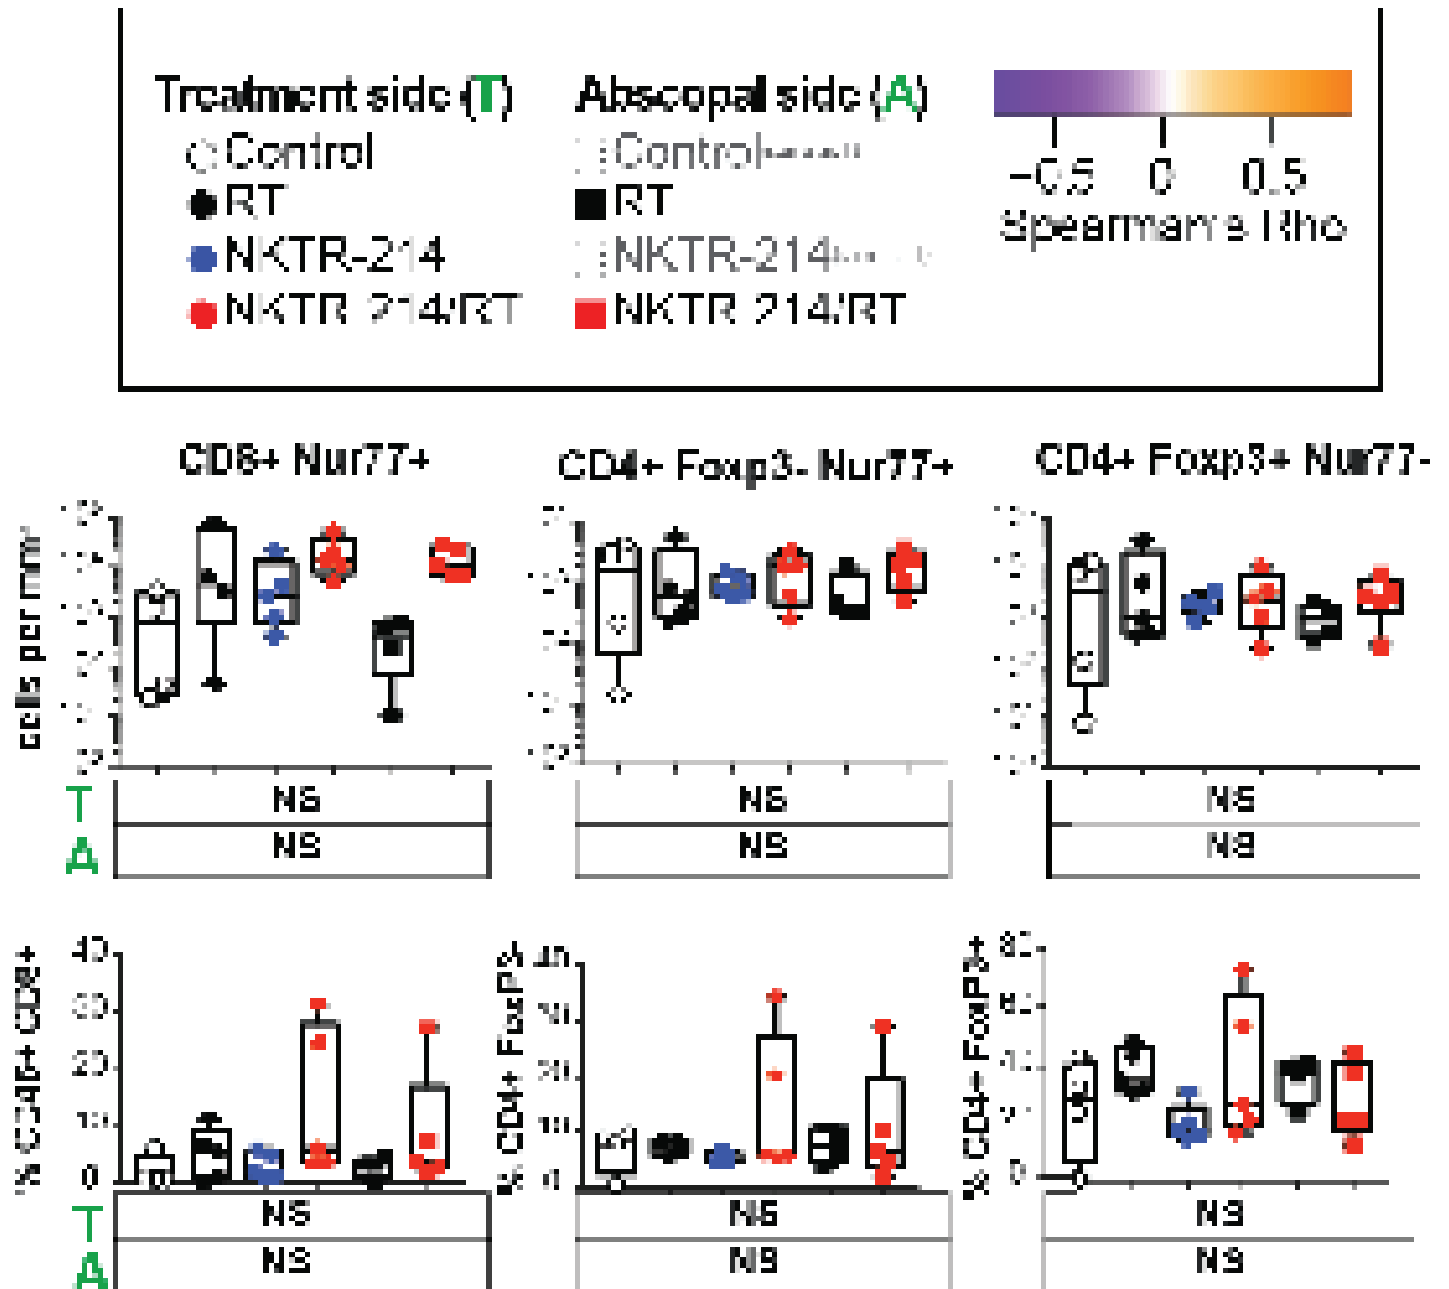

Supplement: jitc-2019-000464supp005.pdf [file jitc-2019-000464supp005.pdf]

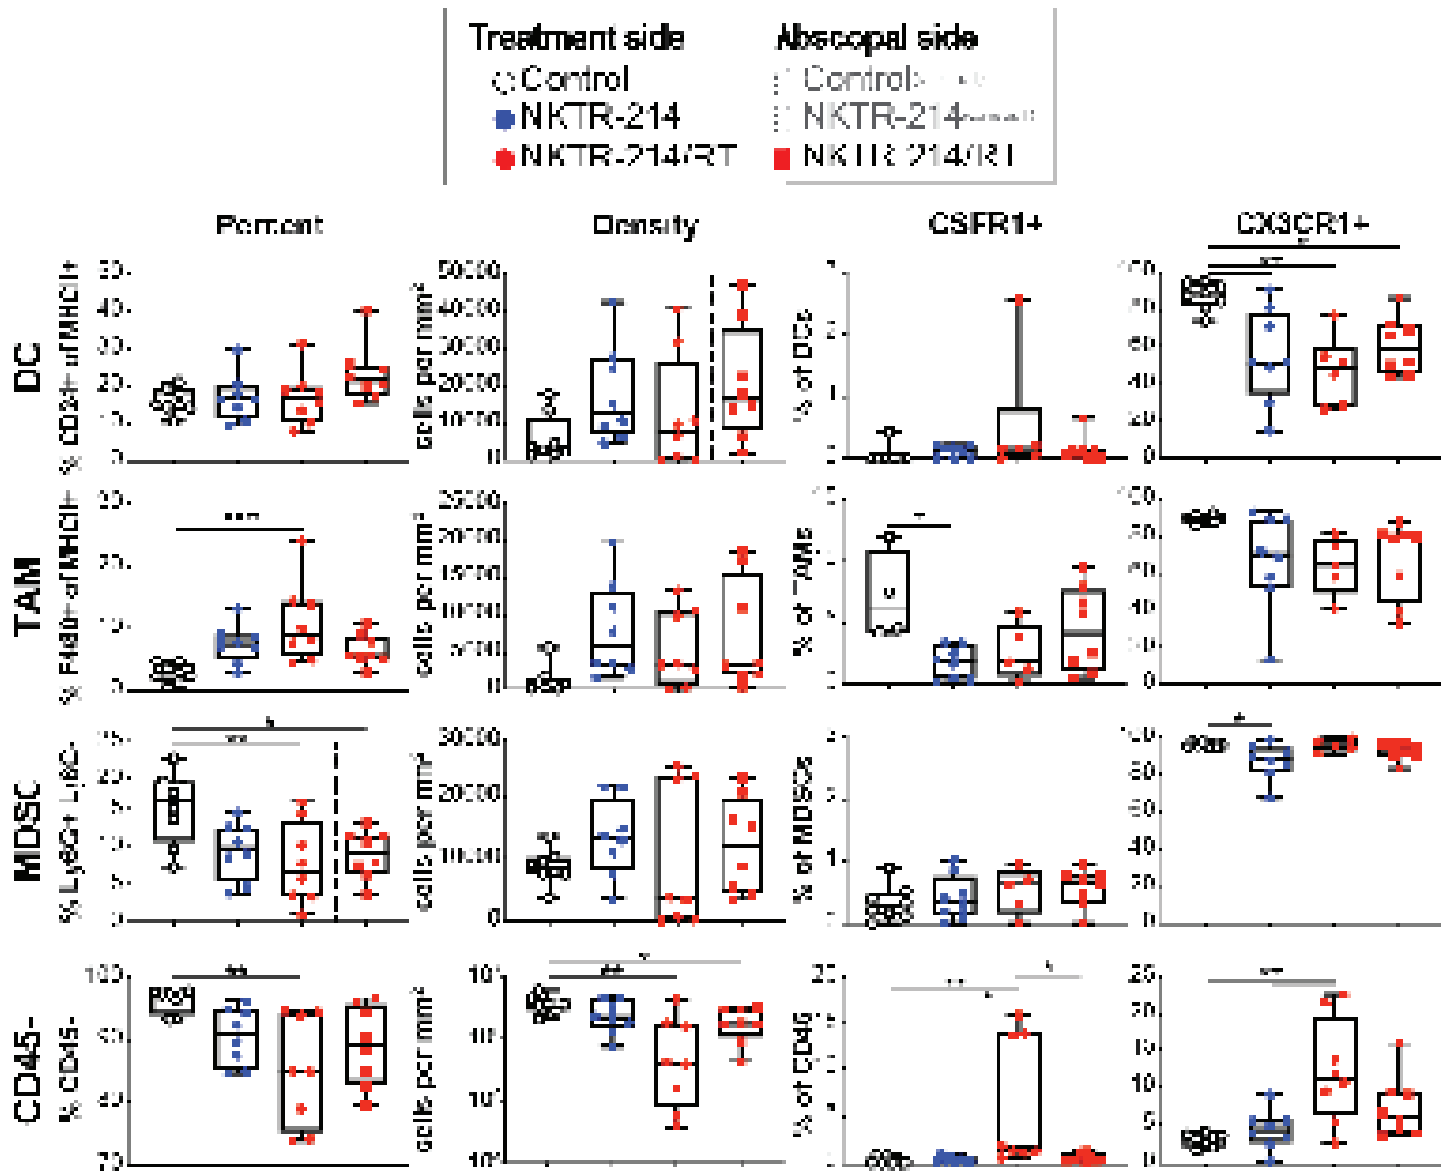

Supplement: jitc-2019-000464supp006.pdf [file jitc-2019-000464supp006.pdf]
